# Supplementary material
Source: HighWire-hosted journal article supplement (https://genome.cshlp.org/content/suppl/2004/07/09/14.8.1555)
Supplement: OnlineSupplementLegend.pdf [file OnlineSupplementLegend.pdf]

## Legend for Online supplement

Sequence ID: Sequence ID for ESTs, E-value: E-value of the left sequence, Human, Fly, Worm: E-values of the homologues in Human, Fly, Worm, Eye expression : the genes which is also expressed in human eye
